# Supplementary material for: Cosmogenic 3 He chronology of postglacial lava flows at Mt Ruapehu, Aotearoa / New Zealand
Source: Copernicus journal article supplement (doi:10.5194/gchron-6-365-2024), 2024-07-10
Supplement: Supplementary file 3 [file gchron-6-365-2024-supplement.zip]

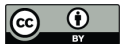

*Supplement of*

**Cosmogenic  $^3\text{He}$  chronology of postglacial lava flows at Mt Ruapehu, Aotearoa / New Zealand**

**Pedro Doll et al.**

*Correspondence to:* Pedro Doll ([pedro.doll@pg.canterbury.ac.nz](mailto:pedro.doll@pg.canterbury.ac.nz))

- [gchron-6-365-2024-supplement-title-page.pdf](#)
- [S1-Examples-of-sampled-surfaces-outliers-and-surfaces-not-suitable-for-surface-exposure-dating.pdf](#)
- [S2.1-magmatic-correction-data.xlsx](#)
- [S2.2-magmatic-ratio-IsoplotR.pdf](#)
- [S3-exposure-ages-various-schemes-models.xlsx](#)
- [S4-samples-data-He-measurements-and-non-cosmogenic-3He-corrections.xlsx](#)
- [S5-Camelplots.pdf](#)

The copyright of individual parts of the supplement might differ from the article licence.
