# Supplementary material for: Cosmogenic 3 He chronology of postglacial lava flows at Mt Ruapehu, Aotearoa / New Zealand
Source: Copernicus journal article supplement (doi:10.5194/gchron-6-365-2024), 2024-07-10

Horizontal axis: exposure age (ka); vertical axis: probability

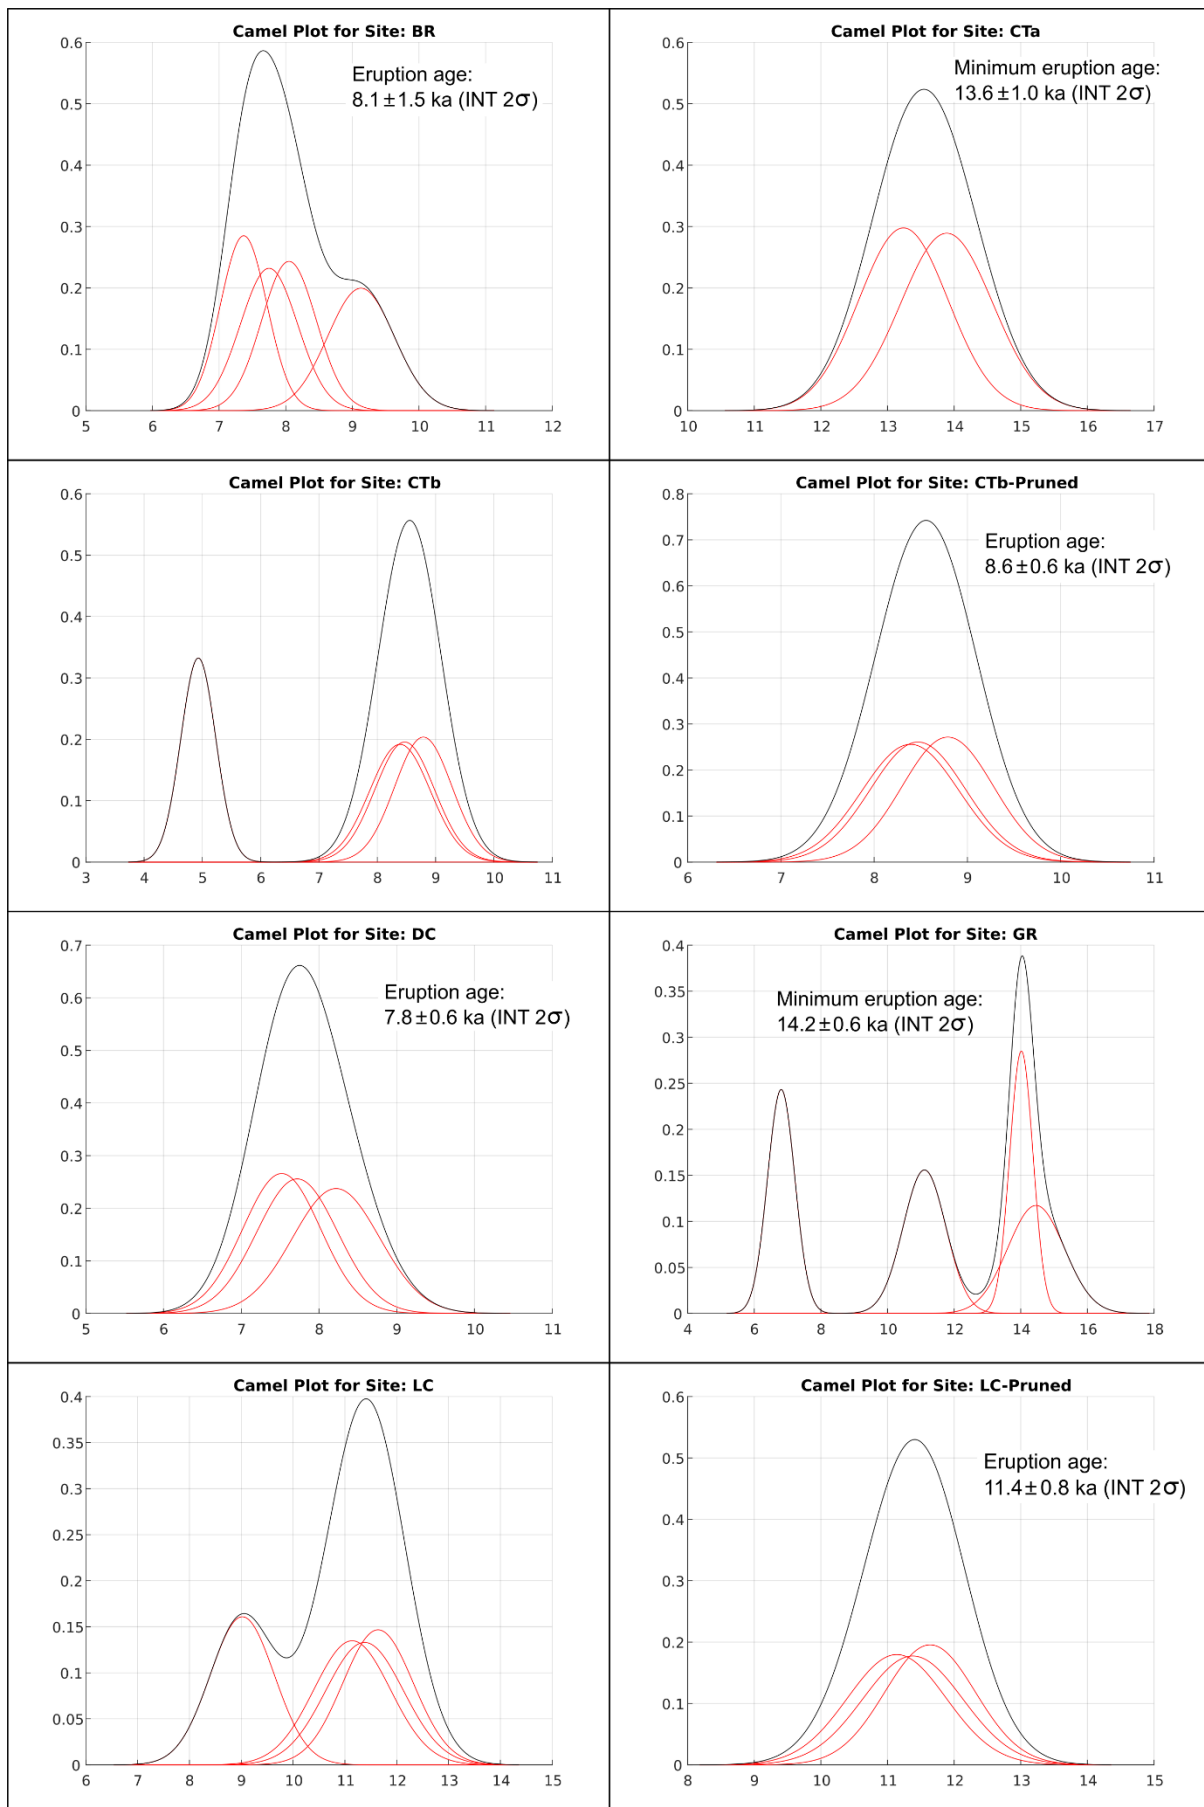

Horizontal axis: exposure age (ka); vertical axis: probability

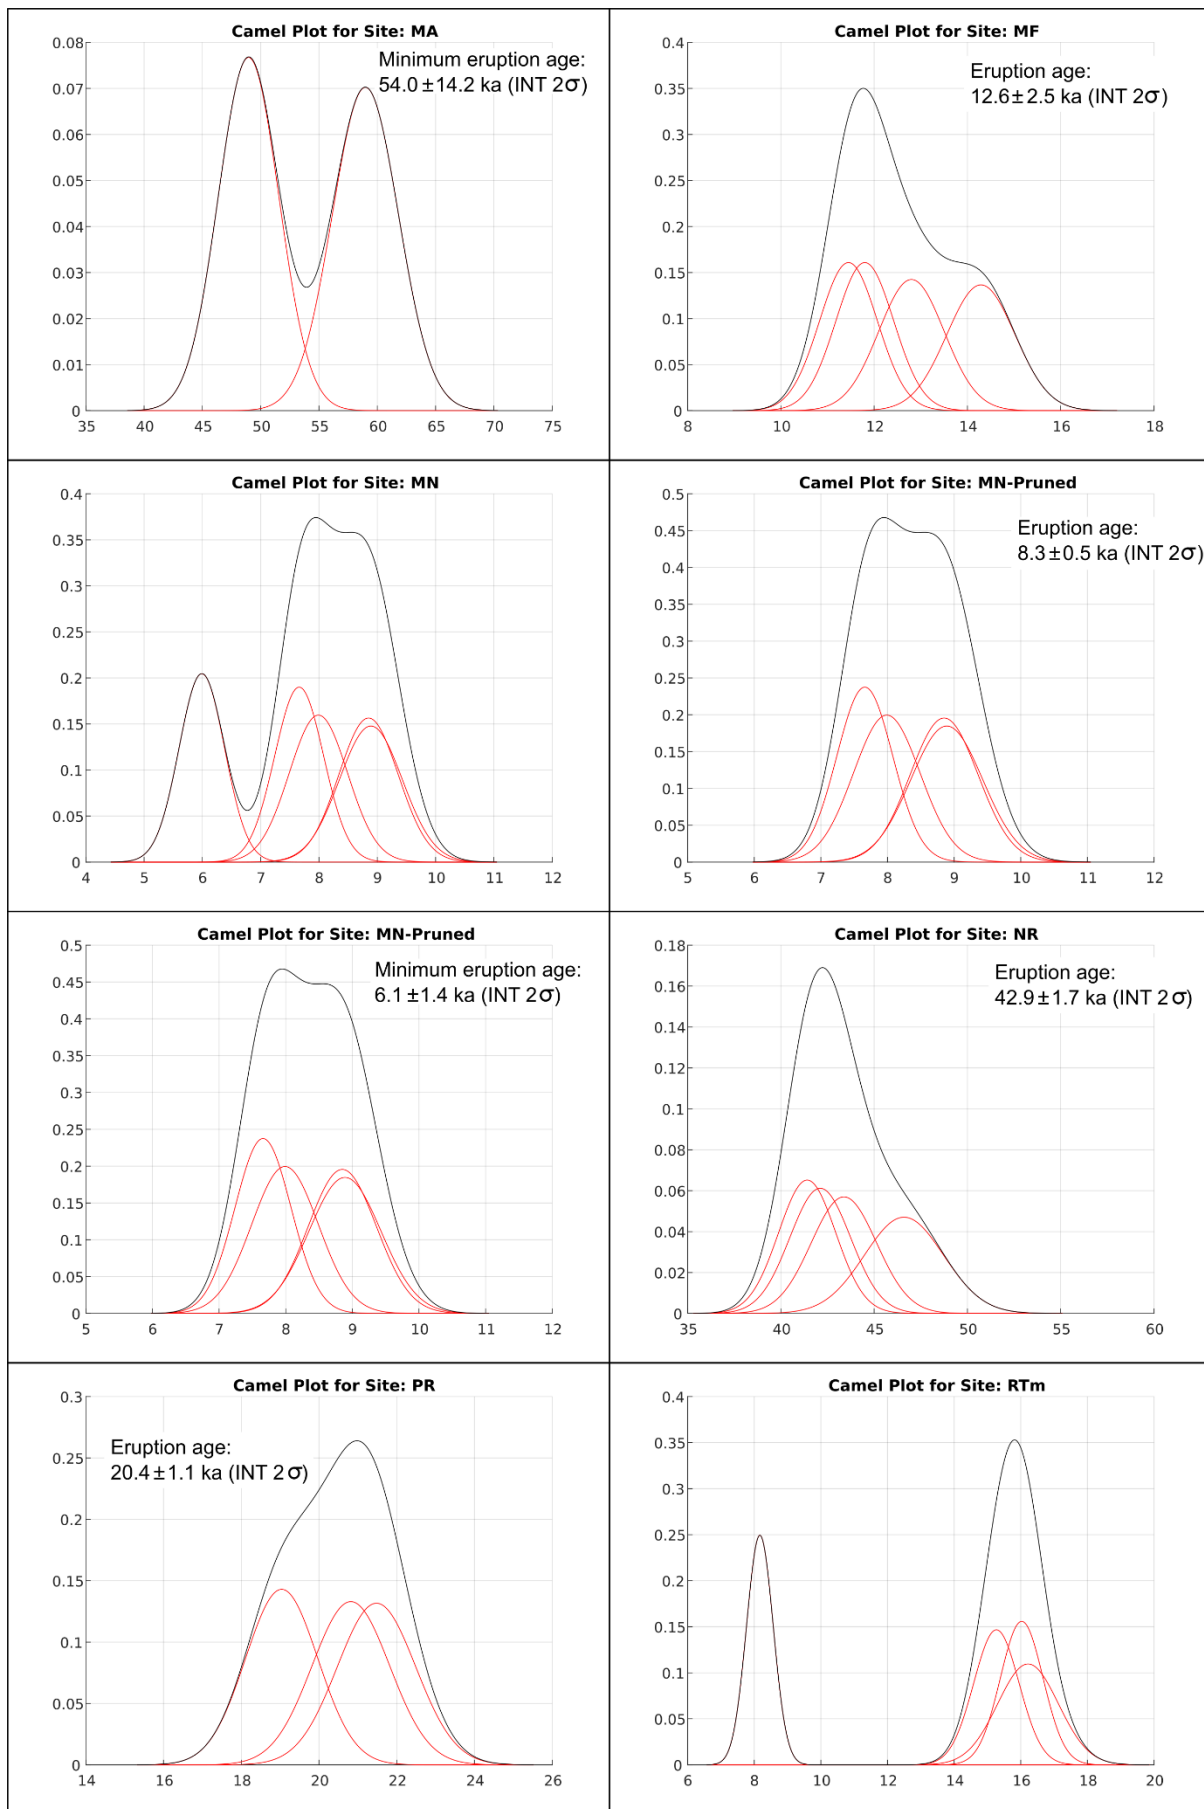

Horizontal axis: exposure age (ka); vertical axis: probability

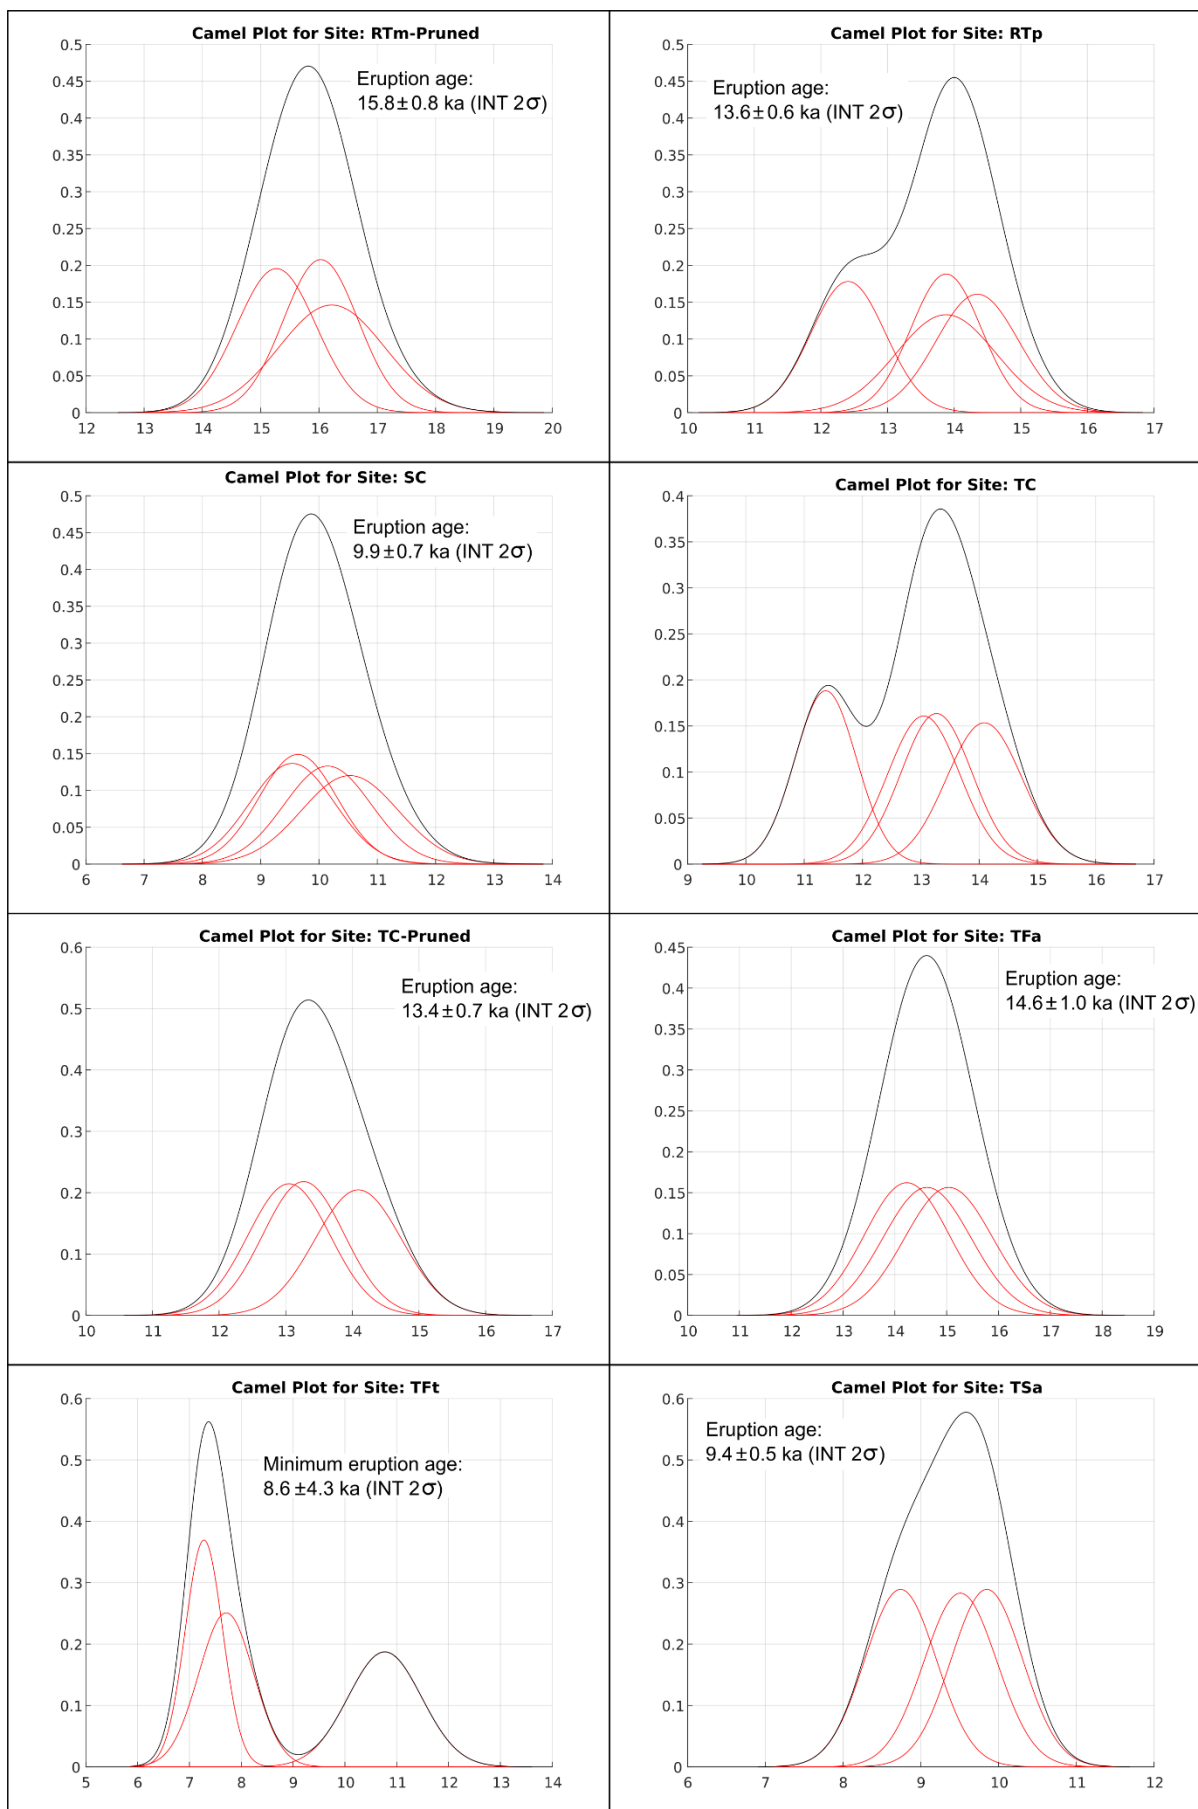

Horizontal axis: exposure age (ka); vertical axis: probability

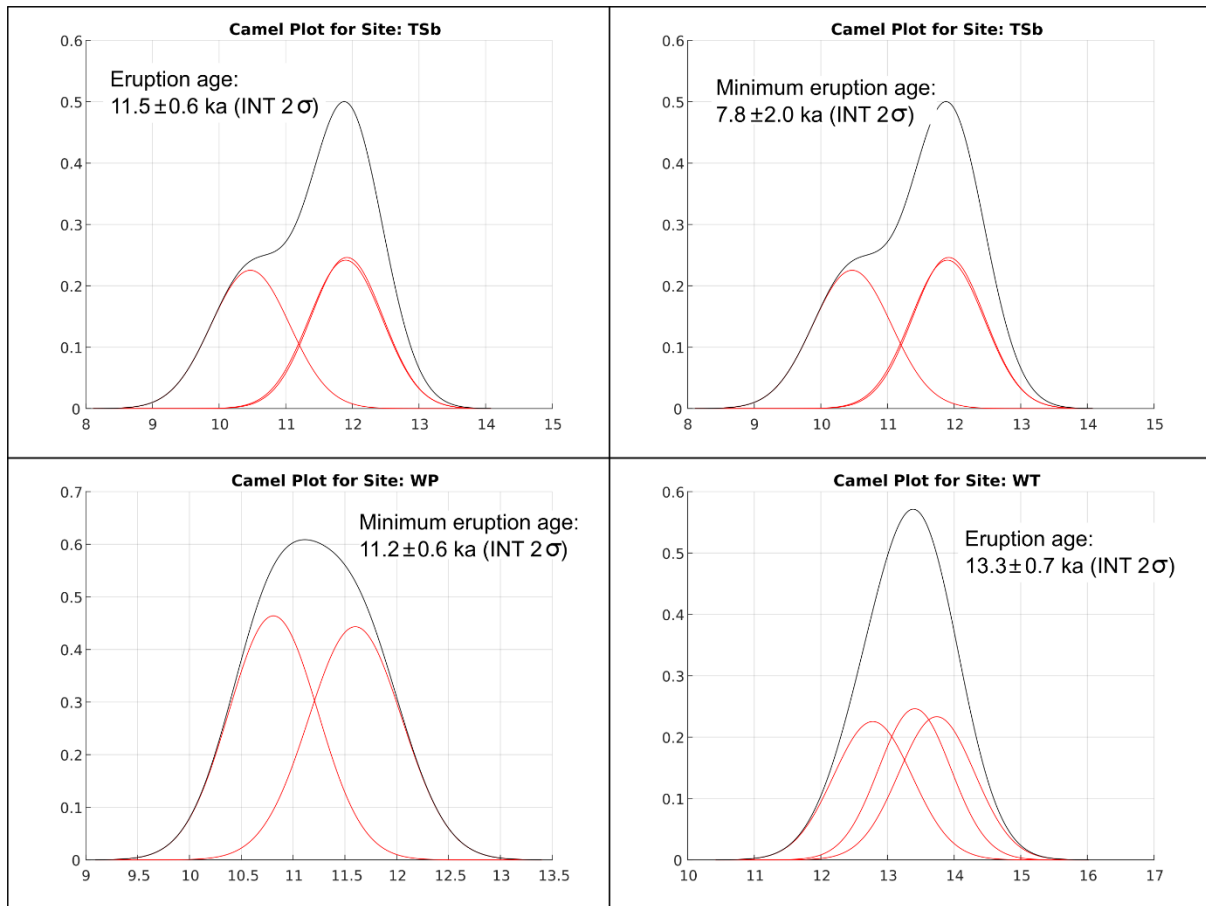

Supplement: Supplementary file 4 [file gchron-6-365-2024-supplement.zip]
