# Supplementary figures and images for: Cosmogenic 3 He chronology of postglacial lava flows at Mt Ruapehu, Aotearoa / New Zealand
Source: Copernicus journal article supplement (doi:10.5194/gchron-6-365-2024), 2024-07-10

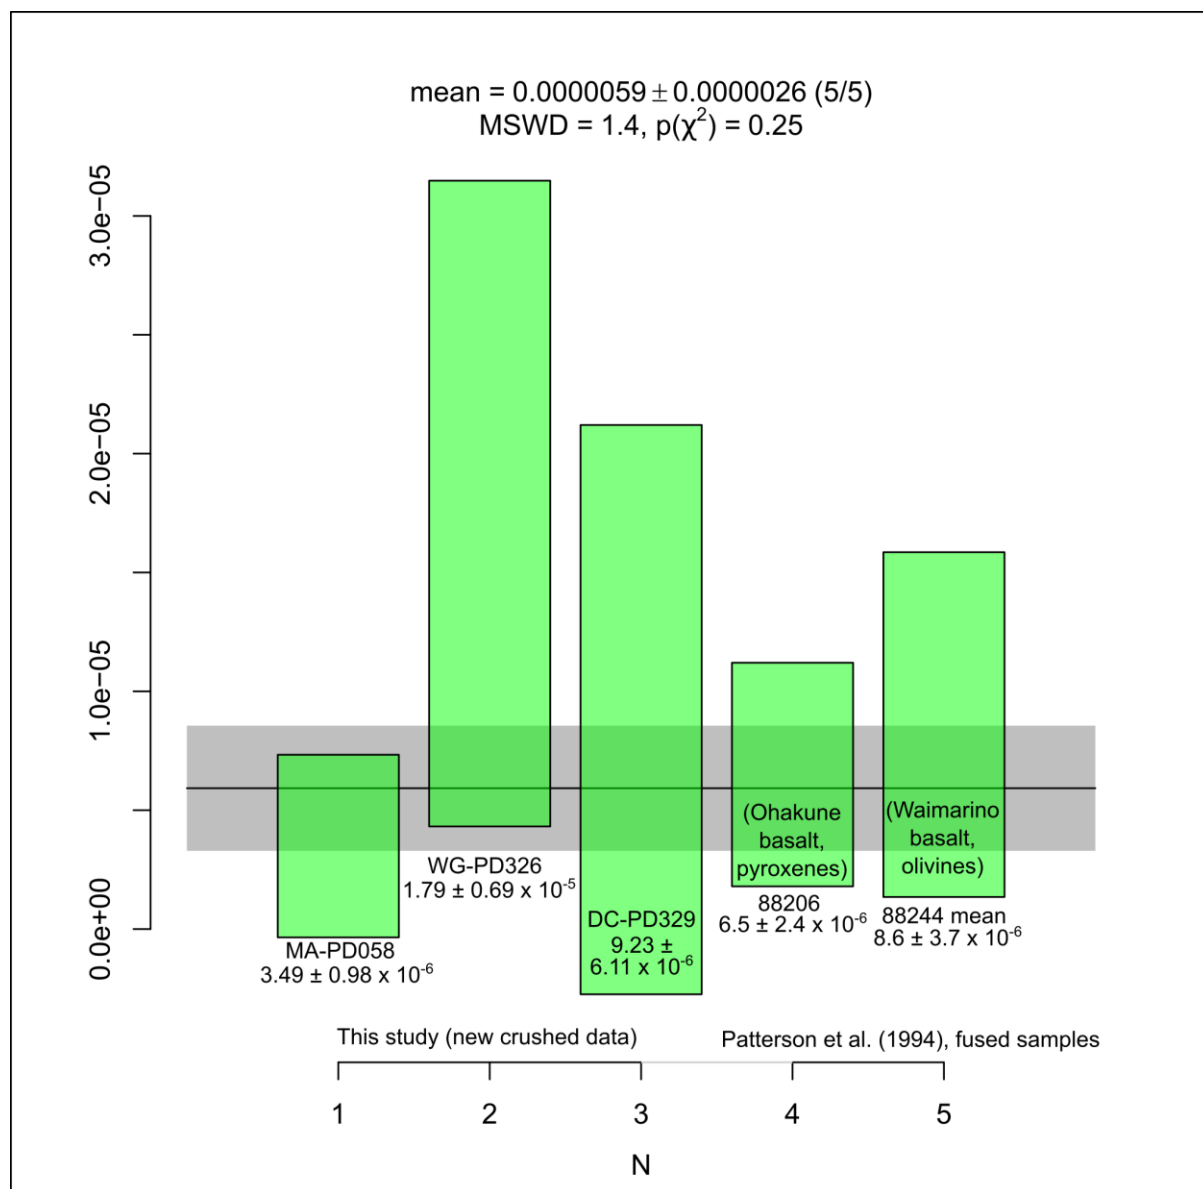

Supplement: Supplementary file 2 [file gchron-6-365-2024-supplement.zip]
